# Supplementary material for: Improvement of Stevia rebaudiana Bertoni In Vitro Propagation and Steviol Glycoside Content Using Aminoacid Silver Nanofibers
Source: MDPI journal article supplement (doi:10.3390/plants11192468), 2022-09-21
Supplement: s1 [file s1]

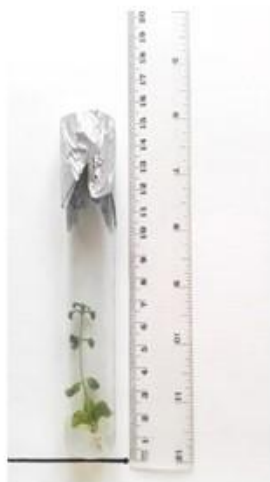

**A**

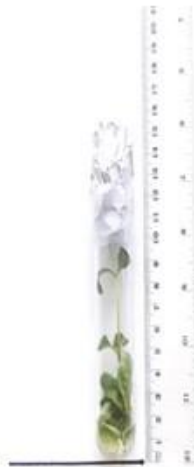

**B**

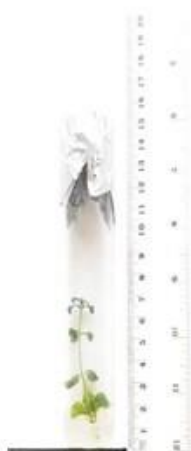

**C**

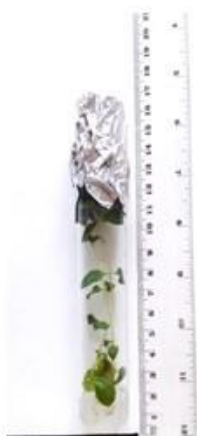

**D**

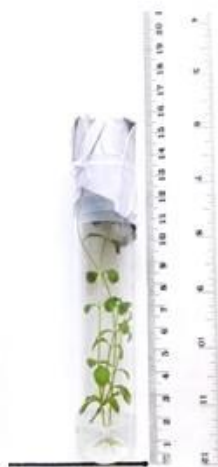

**E**

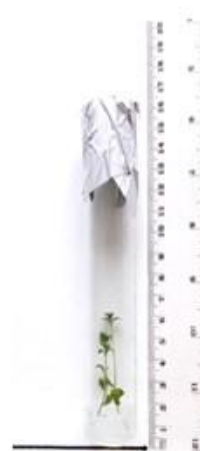

**F**

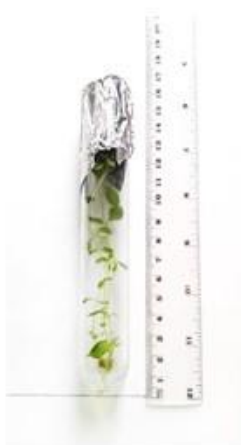

**G**

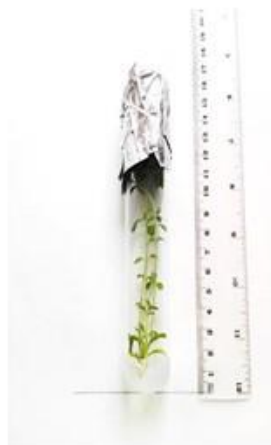

**H**

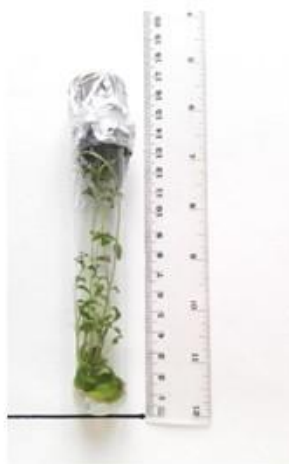

**I**

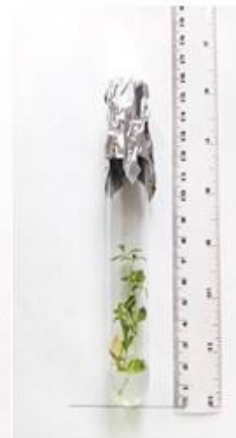

**J**

**Figure S1.** *S. rebaudiana* plantlets *in vitro* propagated on MS medium (**A** control plants); MS medium containing 0.5 mg L<sup>-1</sup> BAP (**B**); MS medium with various concentrations (1, 10, 50, 100 mg L<sup>-1</sup>) of aminoacid nanofibers enriched with 1% (**C, D, E, F**) and 2% colloidal (**G, H, I, J**) Ag particles (NF-1%Ag, NF-2%Ag).
